# Supplementary material for: Are there hardened smokers in low- and middle-income countries? Findings from the Global Adult Tobacco Survey
Source: PubMed Central journal article supplement (PMC6751971; doi:10.18332/tid/100631), 2019-02-18
Supplement: TID-17-11-s1.pdf [file TID-17-11-s1.pdf]

**Supplementary Table. Levels of Educational Attainments in 19 LMICs , GATS 2009–2013**

| <b>Country (survey year)</b> | <b>Low</b>                                    | <b>Middle</b>                            | <b>High</b>                                 |
|------------------------------|-----------------------------------------------|------------------------------------------|---------------------------------------------|
| <b>Nigeria (2012)</b>        |                                               |                                          |                                             |
|                              | No formal schooling                           | Junior secondary school completed        | College/university completed                |
|                              | Less than primary school completed            | Senior secondary school completed        |                                             |
|                              | Complete primary education                    | Less than college/university completed   |                                             |
| <b>Argentina (2012)</b>      |                                               |                                          |                                             |
|                              | No formal education                           | Complete secondary education             | Incomplete tertiary or university education |
|                              | Incomplete primary education                  |                                          | Complete tertiary or university education   |
|                              | Complete primary education                    |                                          | Special education                           |
|                              | Incomplete secondary education                |                                          |                                             |
| <b>Panama (2013)</b>         |                                               |                                          |                                             |
|                              | No formal schooling                           | Secondary school completed               | College/university completed                |
|                              | Special education                             | Vocational                               | Post-graduate degree completed              |
|                              | Less than primary school completed            | Superior no university                   |                                             |
|                              | Primary school completed                      |                                          |                                             |
|                              | Less than secondary school completed          |                                          |                                             |
| <b>Mexico (2009)</b>         |                                               |                                          |                                             |
|                              | Without formal schooling                      | Technical high school                    | Normal upper-level                          |
|                              | Primary                                       | Technical or trade degree                | Undergraduate                               |
|                              | Secondary                                     |                                          | Master/Doctorate                            |
|                              | Technical or trade secondary                  |                                          |                                             |
|                              | Normal basic                                  |                                          |                                             |
|                              | Preparatory or vocational                     |                                          |                                             |
| <b>Uruguay (2009)</b>        |                                               |                                          |                                             |
|                              | No formal schooling                           | Secondary Bachelaurate (4th to 6th)      | Primary, secondary teaching degree          |
|                              | Standard primary school                       | Utu technical Bachelaurate (4th to 6th)  | University or similar                       |
|                              | Special Primary School                        | Technical education                      | Tertiary not university                     |
|                              | Basic cycle of high school or utu 1st to 3rd) | Post-graduate                            |                                             |
| <b>Bangladesh (2009)</b>     |                                               |                                          |                                             |
|                              | No formal schooling                           | Secondary school completed               | College/university completed                |
|                              | Less than primary school completed            | High school completed                    | Post-graduate degree completed              |
|                              | Primary school completed                      |                                          |                                             |
| <b>India (2010)</b>          |                                               |                                          |                                             |
|                              | No formal schooling                           | Secondary school completed               | College/university completed                |
|                              | Less than primary school completed            | Higher school completed                  | Post-graduate degree completed              |
|                              | Primary school completed                      |                                          |                                             |
|                              | Less than secondary school                    |                                          |                                             |
| <b>Indonesia (2011)</b>      |                                               |                                          |                                             |
|                              | Less than primary school completed            | Secondary school completed               | College/university completed                |
|                              | Primary school completed                      | High school completed                    | Post-graduate degree completed              |
| <b>Thailand (2011)</b>       |                                               |                                          |                                             |
|                              | No education/illiterate                       | Grade 9 completed                        | Certificate/vocational education            |
|                              | Less than primary school completed            | More than grade 9 but less than grade 12 | Bachelor degree                             |
|                              | Primary school completed                      | Grade 12 completed /vocational education | Higher than Bachelor degree                 |
|                              | More than grade 6 but less than grade 9       |                                          |                                             |

Continued

Supplementary Table. Continued

| Country (survey year)            | Low                                              | Middle                                                                          | High                                      |
|----------------------------------|--------------------------------------------------|---------------------------------------------------------------------------------|-------------------------------------------|
| <b>Poland (2010)</b>             | No formal education                              | Secondary (high school, technical college)                                      | Bachelor                                  |
|                                  | Incomplete elementary                            | Junior college                                                                  | Higher (starting with Masters degree)     |
|                                  | Elementary                                       |                                                                                 |                                           |
|                                  | Junior High School                               |                                                                                 |                                           |
|                                  | Vocational                                       |                                                                                 |                                           |
| <b>Romania (2011)</b>            | No formal education                              | High school completed                                                           | College completed (short term university) |
|                                  | Primary school completed (4 grades)              | Post high school completed                                                      | University                                |
|                                  | Secondary school completed (grades 5-8)          |                                                                                 | Post-graduate degree completed            |
|                                  | Grades 9-10 of high school completed             |                                                                                 |                                           |
| <b>Russian Federation (2009)</b> | No formal education                              | Vocational school/trade school                                                  | Some college                              |
|                                  | Primary school                                   |                                                                                 | College                                   |
|                                  | Some high school                                 |                                                                                 | Advanced degree                           |
|                                  | High school                                      |                                                                                 |                                           |
| <b>Turkey (2012)</b>             | Not graduated                                    | Primary education                                                               | High school or equivalent                 |
|                                  | Elementary school                                | Secondary or vocational secondary school                                        | College or faculty                        |
|                                  |                                                  |                                                                                 | Master or doctor                          |
| <b>Ukraine (2010)</b>            | No formal education                              | High school completed, incomplete professional & vocational secondary education | College/university completed              |
|                                  | Primary school                                   |                                                                                 | Post-graduate degree completed            |
|                                  | Less than secondary school completed (<9 grades) |                                                                                 |                                           |
|                                  | Basic secondary school completed (full 9 grades) |                                                                                 |                                           |
|                                  | Full secondary school completed (11 grades)      |                                                                                 |                                           |
| <b>Egypt (2009)</b>              | No formal education                              | Complete high school/equivalent education                                       | Diploma                                   |
|                                  | Attended, but not finished primary school        |                                                                                 | Completed university/college              |
|                                  | Complete primary school                          |                                                                                 | Post-graduate degree obtained             |
|                                  | attended, but not finished preparatory school    |                                                                                 |                                           |
|                                  | Complete preparatory school                      |                                                                                 |                                           |
|                                  | attended, but not finished high school           |                                                                                 |                                           |
| <b>China (2010)</b>              | No formal schooling                              | High school/technical secondary school                                          | College/university completed              |
|                                  | Less than primary school completed               |                                                                                 | Post-graduate degree completed            |
|                                  | Primary School Completed                         |                                                                                 |                                           |
|                                  | Less than secondary school completed             |                                                                                 |                                           |
|                                  | Secondary school completed                       |                                                                                 |                                           |

Continued

**Supplementary Table.** Continued

| <i>Country<br/>(survey year)</i> | <i>Low</i>                              | <i>Middle</i>                                | <i>High</i>                                                      |
|----------------------------------|-----------------------------------------|----------------------------------------------|------------------------------------------------------------------|
| <b>Malaysia (2011)</b>           | No formal schooling                     | Secondary school completed                   | College/university completed                                     |
|                                  | Less than primary school completed      | High school completed                        | Post-graduate degree completed                                   |
|                                  | Primary school completed                |                                              |                                                                  |
|                                  | Less than secondary school completed    |                                              |                                                                  |
| <b>Philippines (2009)</b>        | No formal schooling                     | High school graduate                         | College undergraduate                                            |
|                                  | Elementary undergraduate                | Post-secondary, includes in years 1, 2, or 3 | College graduate                                                 |
|                                  | Elementary graduate                     |                                              | Post-graduate degree completed                                   |
|                                  | High school undergraduate               |                                              |                                                                  |
| <b>Vietnam (2010)</b>            | No formal education                     | Having completed secondary school            | Graduated University/college/<br>specialized secondary education |
|                                  | Not having completed primary education  |                                              | Having been post-graduated                                       |
|                                  | Having completed primary education      |                                              |                                                                  |
|                                  | Having completed basic secondary school |                                              |                                                                  |

© 2019 Yin S.
